# Supplementary figures and images for: Evaluation of the Physical and Shape Memory Properties of Fully Biodegradable Poly(lactic acid) (PLA)/Poly(butylene adipate terephthalate) (PBAT) Blends
Source: MDPI journal article supplement (doi:10.3390/polym15040881), 2023-02-10

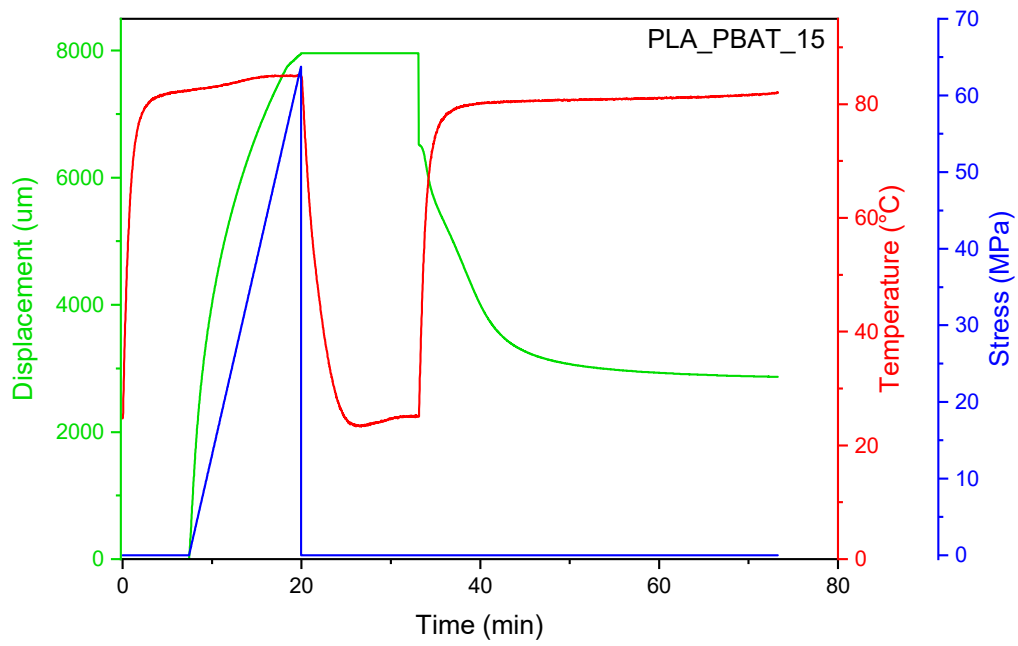

(a)

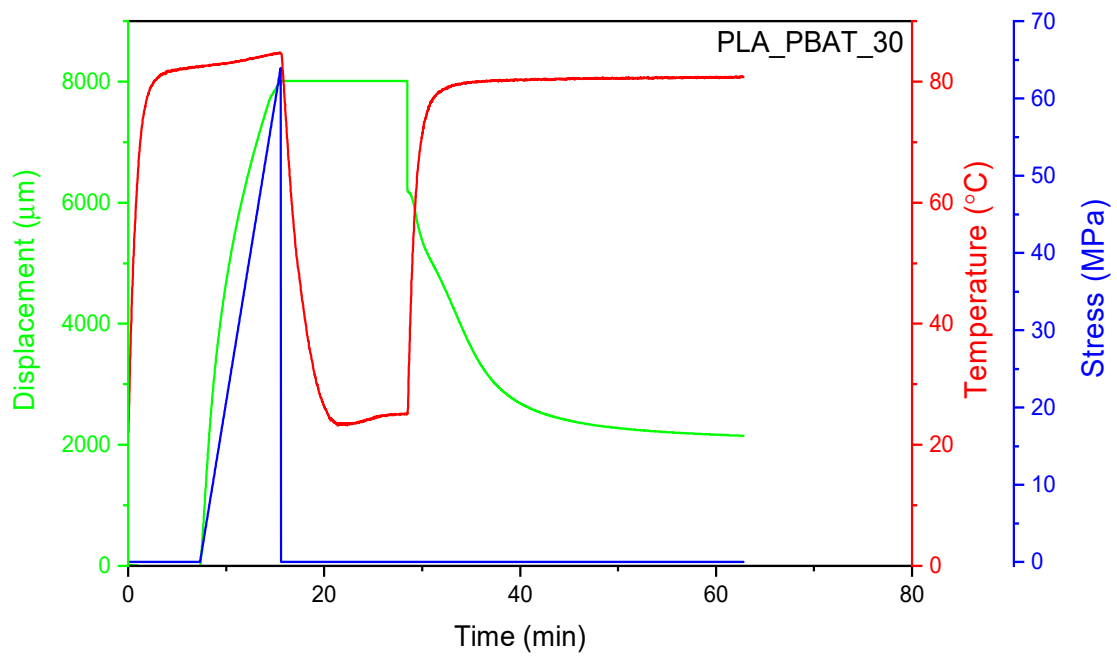

(b)

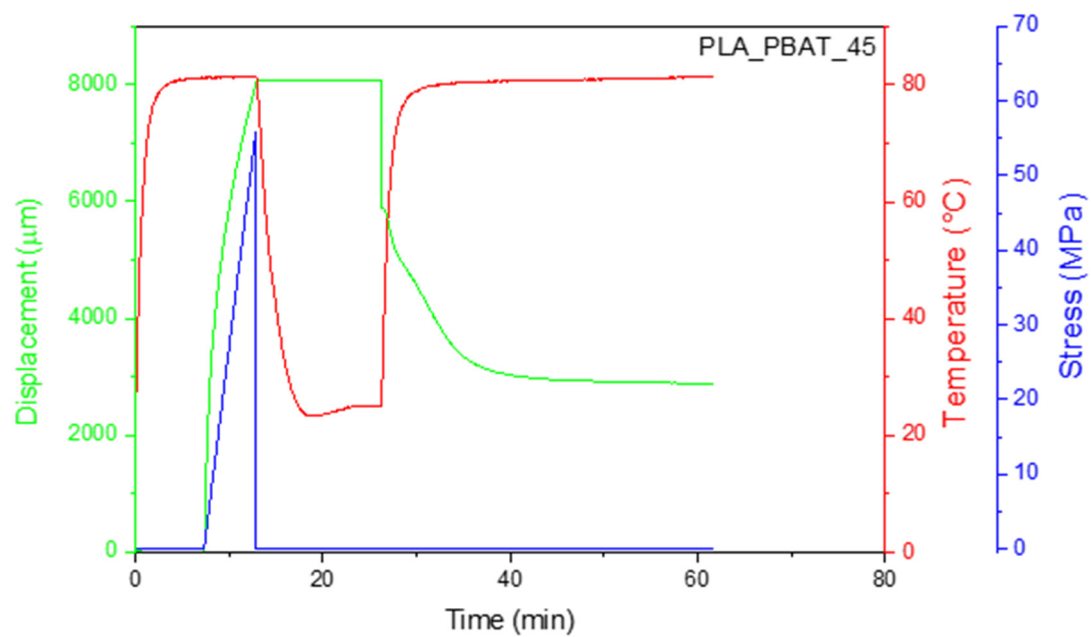

(c)

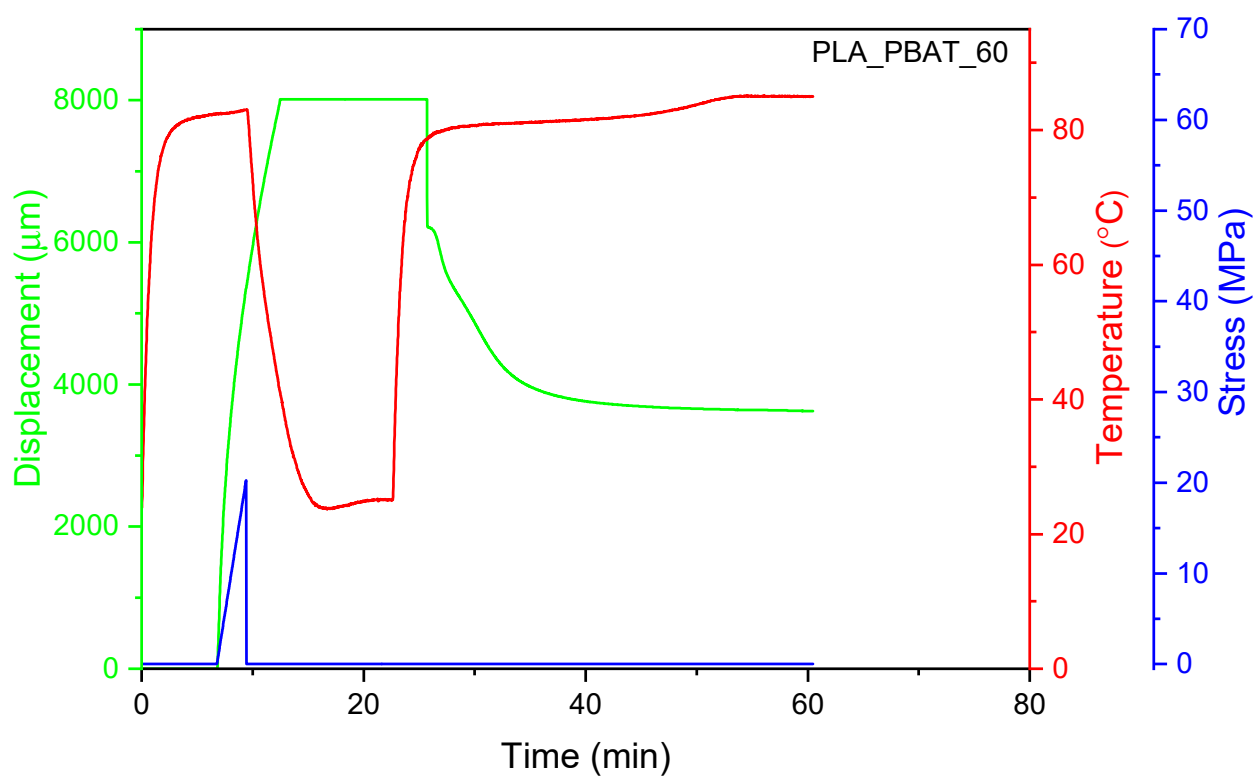

(d)

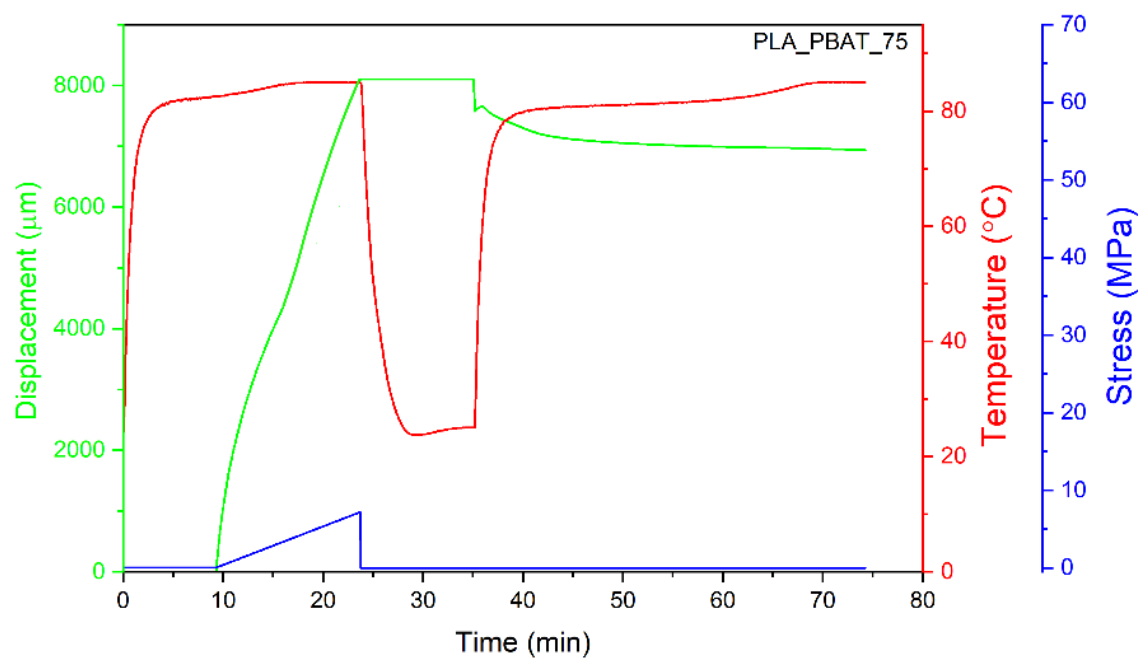

(e)

**Figure S1.** Thermo-mechanical cycle of (a) PLA\_PBAT\_15, (b) PLA\_PBAT\_30, (c) PLA\_PBAT\_45, (d) PLA\_PBAT\_60, (e) PLA\_PBAT\_75.

Supplement: s1 [file s1]
